# Supplementary material
Source: Research Square preprint supplement (doi:10.21203/rs.3.rs-8398446/v1)
Supplement: Supplementary file 1 [file 700345f37db3b391cce101ab.pdf]

## Community Misinformation Management Fellowship Program Need Assessment Questionnaire

### Section A: Sociodemography of Participants

1. Age of Respondent: 15-20 { } 21-25 { } 26-30 { } 31-35 { } 36-40 { } 41-45 { }  
51 and above { }
2. Gender of Respondent: Male { } Female { }
3. Occupation of Respondent:
  - Civil Servant { }
  - Healthcare workers { }
  - Business entrepreneur { }
  - Religious leaders { }
  - Retired civil servants { }
  - Farmers { }
  - Journalist { }
  - Home maker { }
  - Student { }
  - Furniture maker { }
  - Community member { }
4. Category of Respondents:
  - Primary Health workers { }
  - Health Educator { }
  - Religious Leaders { }
  - Community/traditional leaders { }
  - Patent and Proprietary Medicine Vendors (PPMV) { }
  - Media { }
  - Traditional Medicine Vendors (TMC) { }
  - Ward Health Development Committee (WHDC) { }
  - Community members { }
  - Healthcare practitioners { }
  - Immunization officer { }
  - Security Officer { }
  - Farmers { }
  - Others, please specify .....
5. Location (Local Government Area):
  - Lapai { }
  - Paikoro { }
  - Chachanga { }
  - Wushishi { }

### Section B: Health Misinformation Awareness

6. What platform do you frequently encounter health-related information?
  - Social media { }
  - Websites { }
  - Community gatherings { }
7. How confident are you in identifying accurate health information from misleading or false information?
  - Very confident { }
  - Confident { }

- Neutral { }  
 Not confident { }  
 Not at all confident { }
8. What is the most common platform where health misinformation is often shared in your state/community?  
 Social media { }  
 Website { }  
 Community gatherings { }  
 Others { }

**Section C: Existing health misinformation management strategies**

9. Are you aware of any existing strategies in the state/community to manage health misinformation? Yes { } No { }
10. What are the existing strategies?  
 Emir to educate his subjects and the community { }  
 Health education for religious leaders { }  
 Health education in community gatherings and house-to-house sensitization { }  
 Health education on radio programs { }  
 Health education in social gatherings { }  
 Town announcers { }

**Section D: Assessing education awareness and capacity building needs for community health misinformation management**

11. Is there a lack of awareness of education about health misinformation in the state/community?  
 Yes { } No { }
12. What specific areas do you think community health misinformation management capacity building should focus on?

| <b>Specific areas community health misinformation capacity building should focus on</b> | <b>Yes</b> | <b>No</b> |
|-----------------------------------------------------------------------------------------|------------|-----------|
| Enhancing skills in identifying reliable health information sources                     |            |           |
| Improving abilities to critically evaluate health information online                    |            |           |
| Strengthening data collection and analysis techniques                                   |            |           |
| Developing effective response strategies to address health misinformation               |            |           |
| Fostering collaboration with stakeholders for impactful interventions                   |            |           |
